# Supplementary material
Source: ML conference proceedings conference paper supplement (https://openreview.net/forum?id=px1674Wp3C)
Supplement: supplementary_material [file attachment]

## Geometric Description Generation via Information Recovery

### QA Example1

**Q:**  $\odot O$  is the circumscribed circle of  $\triangle ABC$ , ...  $\angle ABO=30.0$ , then the size of  $\angle ACB$  is ?

**A:** In triangle AOB,  $OA=OB$ ,  $\angle ABO=30^\circ$ ; Therefore,  $\angle AOB=180^\circ - 2\angle ABO=120^\circ$ ; Therefore,  $\angle ACB=1/2 \angle AOB=60^\circ$

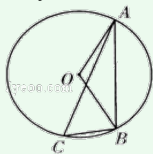

### Image Description

The diagram consists of a triangle ABC inscribed within a circle O. Points A, B, and C are the vertices of the triangle, and they lie on the circumference of the circle. The center of the circle is marked as point O.

Diagram Representation Uniqueness

## Generate Contrastive QA Pairs for Basic Elements

### Logic Form

Similar(Triangle(A,B,C),Triangle(C,B,D))  
...

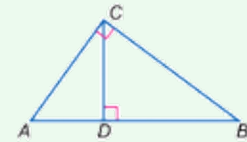

### Info Items

1. Triangle ABC is similar to triangle CBD.  
...

### Contrastive QA pairs

**Q:** Is point D the lies on line BC?  
**A:** No, ... , point D lies on the line segment AB.

Logic Structure Uniqueness

## Geometry Characteristic

### Geometric Solution Generalizability

#### Variable Substitution and Equation Solving

#### QA Example2

**Q:** Point B is in line AC, line AB is 1, line AC is 3, line BC is ?  
**A:** Line BC is 2.

**Q:** Point B is in line AC, line AB is  $x$  ( $x=1$ ), line AC is  $y$  ( $y=3$ ), line BC is ?

**A:** Denote BC as  $z$ , we can build the equation  $x+z=y$ , therefore  $z=y-x$ , which simplifies to  $z=3-1=2$ . Thus, BC is 2.

### Geometric Scalability

#### Value Scaling

#### QA Example2

**Q:** Point B is in line AC, line AB is 2, line AC is 6, line BC is ?  
**A:** The length of BC is 4 units, obtained by subtracting AB (2 units) from AC (6 units).

### Conditional Uniqueness

#### Re-Formulating Condition as Unknown

#### QA Example2

**Q:** Point B is in line AC, line AB is  $u$ , line AC is 3, line BC is 2.  
**What is the value of  $u$ ?**  
**A:** Denote AB as  $u$ , we can determine  $u$  by solving  $u+2=3$ . Therefore,  $u$  equals 1.

### Reasoning Diversity

#### Sentence Paraphrase

#### QA Example2

**Q:** Given that Point B lies on line segment AC, with  $AB=1$  unit and  $AC=3$  units, what is the length of segment BC?  
**A:** BC can be determined by subtracting the length of segment AB from the length of segment AC. Since AB is 1 unit and AC is 3 units,  $BC = AC - AB$ , which equals 2 units.
